# Supplementary material for: Synthesis of polyethylene/exfoliated MoS2 nanocomposites by in situ exfoliation polymerization using Ziegler–Natta catalyst intercalated MoS2
Source: Royal Society of Chemistry journal article supplement (doi:10.1039/c7ra10853b), 2017-01-01
Supplement: c7ra10853b1.pdf [file c7ra10853b1.pdf]

**Synthesis of Polyethylene/Exfoliated MoS<sub>2</sub> Nanocomposites by In Situ Exfoliation Polymerization Using Ziegler-Natta catalyst intercalated MoS<sub>2</sub>**

Hao Zhang,<sup>a</sup> He-Xin Zhang,<sup>b,c\*</sup> and Keun-Byoung Yoon<sup>c\*</sup>

<sup>a</sup>College of Food Science and Engineering, National Engineering Lab. for Wheat and Corn Deep Processing, Jilin Agricultural University, Changchun, China

<sup>b</sup>School of Chemistry and Chemical Engineering, Anhui University of Technology, China (Email: polyhx@ciac.ac.cn)

<sup>c</sup>Department of Polymer Science and Engineering, Kyungpook National University, Korea (Email: kbyoon@knu.ac.kr)

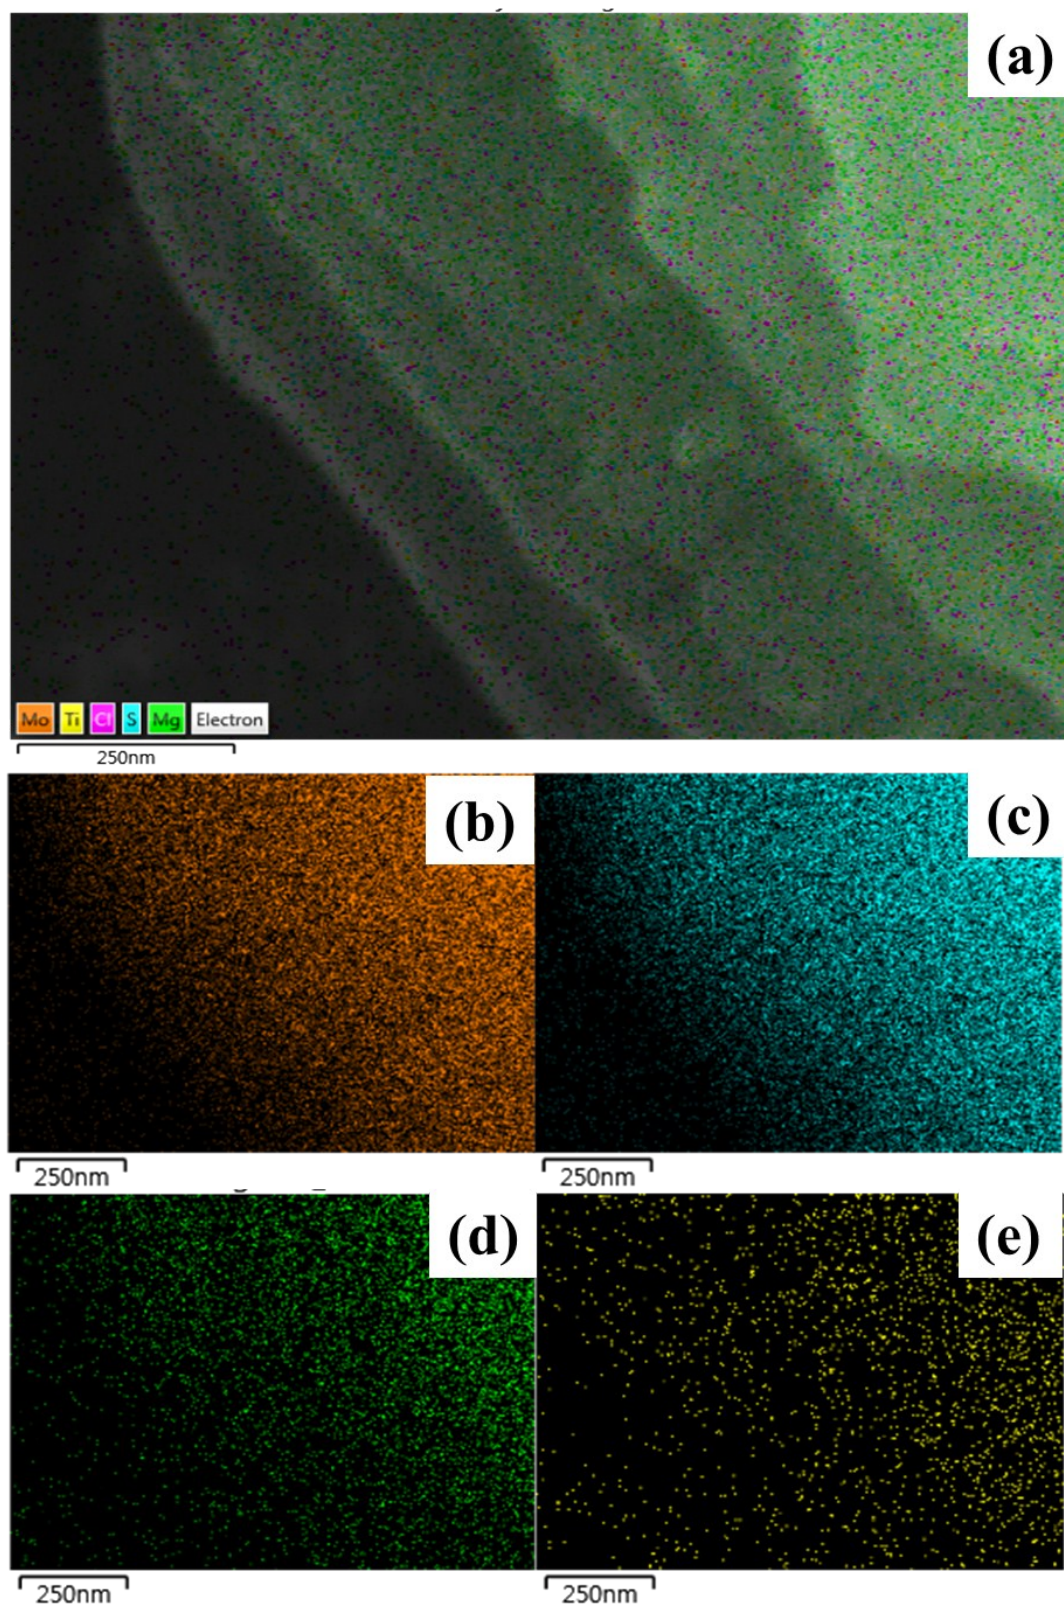

Figure S1. SEM image of (a)  $\text{MoS}_2\text{-MgCl/TiCl}_4$  catalyst edge and the EDS elemental mapping images of (b) Mo, (c) S, (d) Mg and (e) Ti from (a)

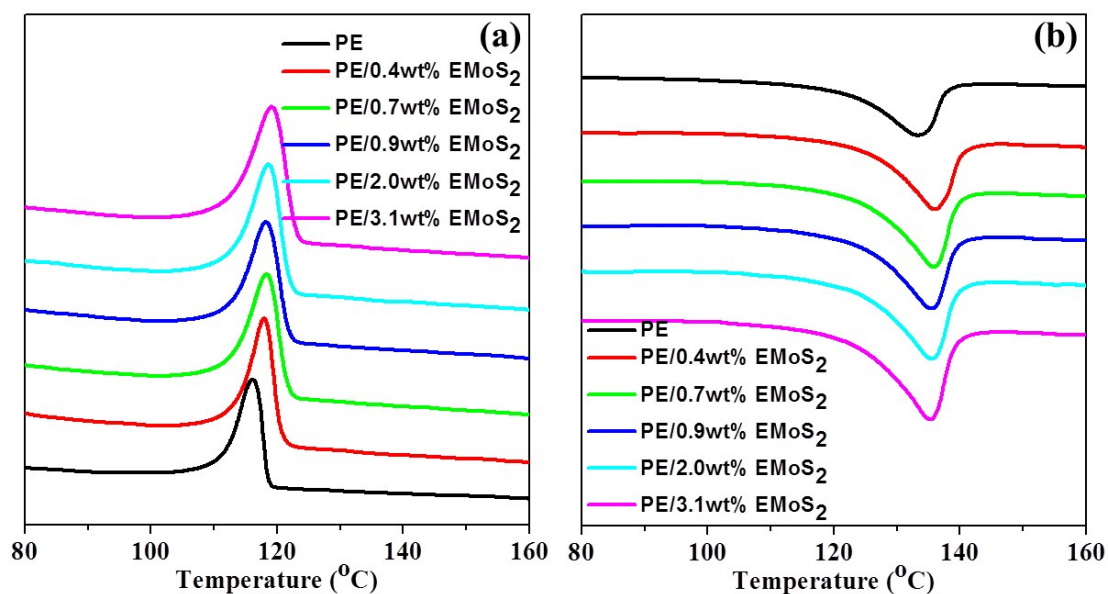

Figure S2. DSC (a) cooling and (b) heating curves of PE and PE/EMoS<sub>2</sub> nanocomposites with different EMoS<sub>2</sub> contents.

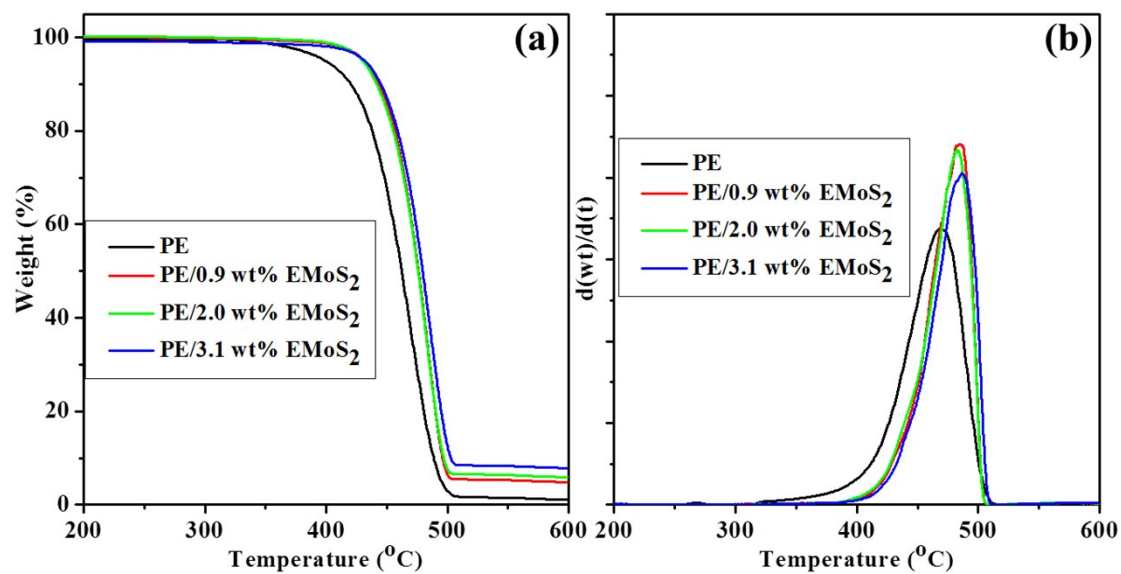

Figure S3. TGA and DTG curves of PE and PE/EMoS<sub>2</sub> nanocomposites.
